# Supplementary material for: Repellence properties of catnip essential oil against the mosquito species Aedes aegypti
Source: Research Square preprint supplement (doi:10.21203/rs.3.rs-3578581/v1), 2023-11-14
Supplement: Supplementary file 1 [file 50b3f6459ce948d799057874.pdf]

**Table 1.** GC-MS analysis of *Nepeta cataria* Chemotype A essential oil composition. Oil distillation and GC-MS analysis were performed as per the Materials and Methods section. Each replicate comprised a different batch of *N. cataria* tissue and was distilled separately. No other compounds passed the detection threshold.

| Replicate                                     | (4aS,7S,7aR)-Nepetalactone % | Caryophyllene % | Caryophyllene oxide % |
|-----------------------------------------------|------------------------------|-----------------|-----------------------|
| <i>Nepeta cataria</i> Chemotype A Replicate 1 | 96.76                        | 1.78            | 1.46                  |
| <i>Nepeta cataria</i> Chemotype A Replicate 2 | 98.10                        | 1.74            | 0.16                  |
| <i>Nepeta cataria</i> Chemotype A Replicate 3 | 98.14                        | 1.02            | 0.83                  |
| <b>MEAN</b>                                   | <b>97.67</b>                 | <b>1.51</b>     | <b>0.82</b>           |
| Standard Deviation                            | 0.79                         | 0.43            | 0.65                  |
